# Supplementary material for: Competing processes determine the long-term impact of basal friction parameterizations for Antarctic mass loss
Source: Copernicus journal article supplement (doi:10.5194/tc-20-1217-2026), 2026-02-16
Supplement: Supplementary file 1 [file tc-20-1217-2026-supplement.pdf]

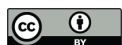

*Supplement of*

## **Competing processes determine the long-term impact of basal friction parameterizations for Antarctic mass loss**

**Tim van den Akker et al.**

*Correspondence to:* Tim van den Akker ([tim.vandenakker@geo.su.se](mailto:tim.vandenakker@geo.su.se))

The copyright of individual parts of the supplement might differ from the article licence.

## Rewriting of the basal friction parameterizations

For Eq 1.2, the rewriting is straight-forward:

$$C_p = \frac{C_c N \left( \frac{u_b}{u_b + u_0} \right)^m}{u_b^m} \quad (S1)$$

For the Pseudoplastic law, a similar method is used:

$$C_{cp} = \frac{C_c \left( \frac{u_b}{u_b + u_0} \right)^m}{\left( \frac{u_b}{u_0} \right)^{\frac{1}{pp}}} \quad (S2)$$

Here,  $C_c$  is the inverted free parameter in Eq 1.4, and  $C_p$  the constant needed in Eq 1.2,  $C_{cp}$  the constant needed in Eq. 1.3. Rewriting Eq. 1.3 is less straight-forward, first we define:

$$\beta = \frac{\tau_{b,Reg}}{u_b} = C_c N \frac{u_b^{m-1}}{(u_b + u_0)^m} \quad (S3)$$

Eq 1.6 has two free parameters,  $C_p$  and  $C_c$ . The former controls the strength of the Weertman style friction, the latter controls the strength of the coulomb style friction. Since we inverted for  $C_c$  in Eq 1.12 in the initialization procedures, we use the inferred value to compute a  $C_p$  so that Eq 1.2. gives the same basal friction at the end of the initialization as Eq 1.1:

$$C_p = \left( \frac{\alpha}{1 - \gamma} \right)^{\frac{1}{m}} \quad (S4)$$

With:

$$\alpha = \left( \frac{\beta}{u_b^{m-1}} \right)^{\frac{1}{m}} \quad (S5)$$

And:

$$\gamma = \left( \frac{\beta}{C_c N u_b^{m-1}} \right)^{\frac{1}{m}} u_b \quad (S6)$$

## Results – Buttressing number

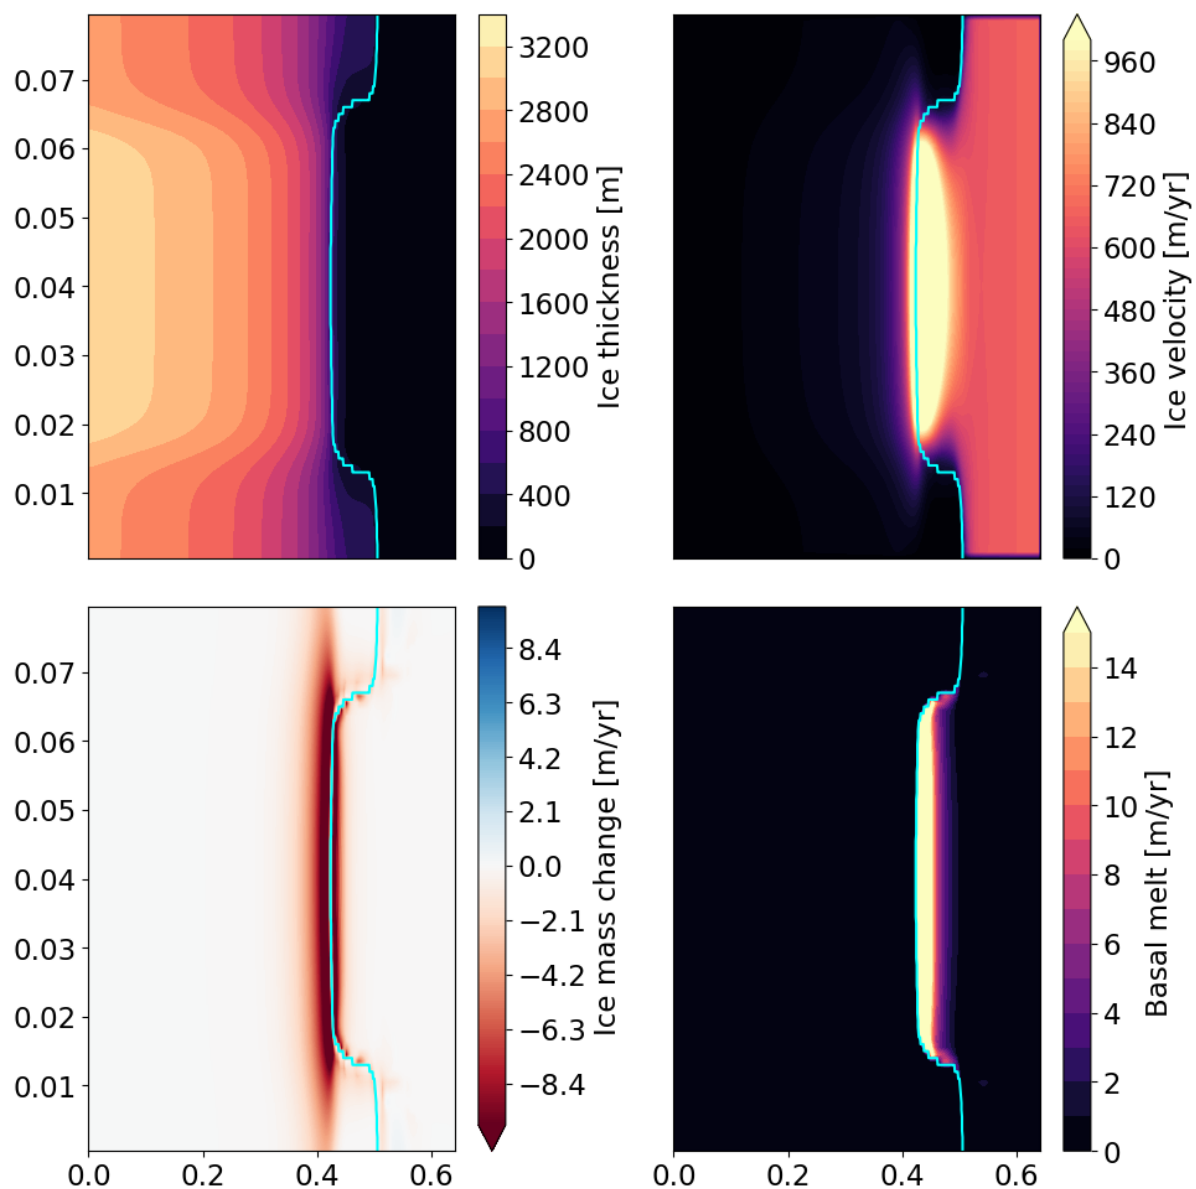

**Fig S1 Characteristics of the modelled state of the MISIP+ Ice 1r experiment after 50 years.** (Top left) Modelled ice thickness, (top right) modelled ice surface velocity, (bottom left) ice mass change and (bottom right) basal melt rates. The modelled grounding line is shown in cyan. The x and y coordinates are fictive.

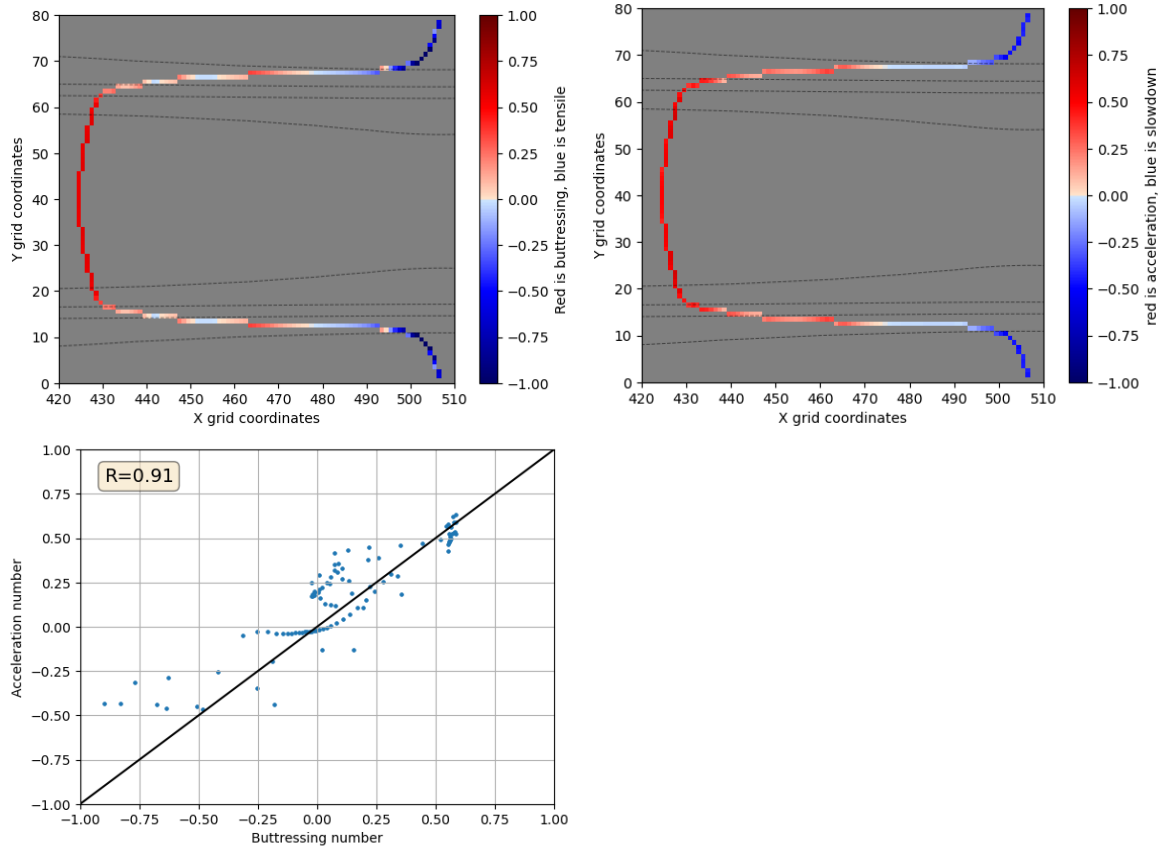

**Fig S2 buttressing number and the acceleration number of the MISIP+ Ice1r experiment.** (Top row, left) the buttressing number at the grounding line after 40 years of the MISIP+ Ice1r experiment. (Top row, right) the acceleration at the grounding line when the shelf is instantly removed. Black dashed lines represent the bedrock topography, from -750 meters in the centre of the plot with increments of 150 meters in the directions of the lateral margins. (Bottom row) correlation plot between the acceleration and buttressing number, 208 data points are used.

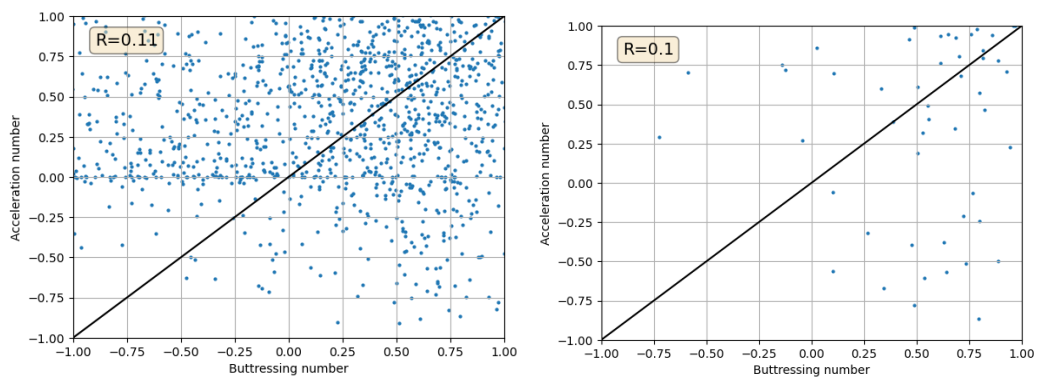

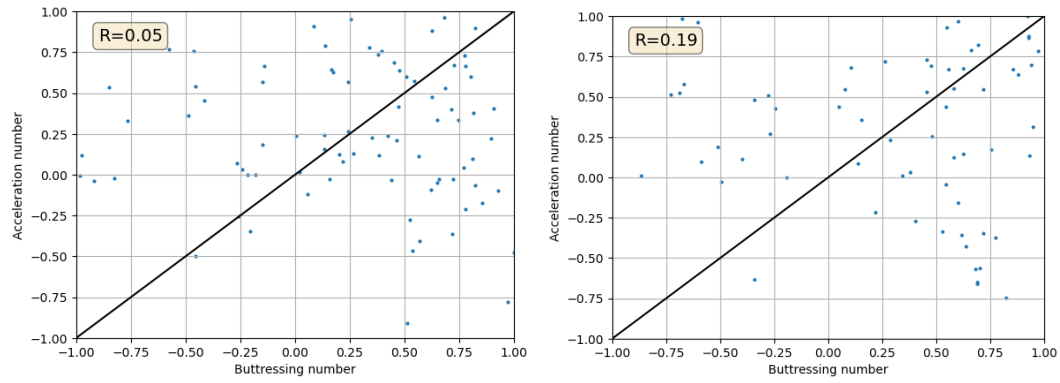

**Fig S3.** Acceleration number and buttressing number for (top, left) the whole Antarctic ice sheet (top, right) ASE region (bottom, left) the Ross shelf and (bottom, right) the Filchner-Ronne.

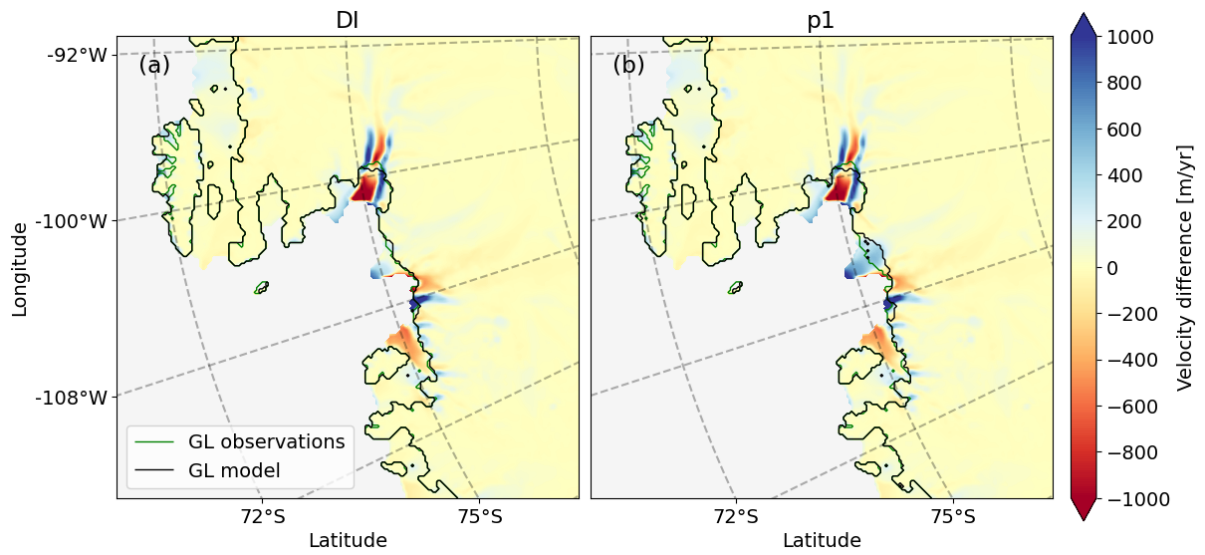

**Figure S4.** Ice surface velocity misfit for P05 (left) and P1 (right) at the end of initialization. Misfit is shown as model minus observations (of Rignot et al. (2011)). The modelled grounding line is shown in black, and the observed grounding line in green.

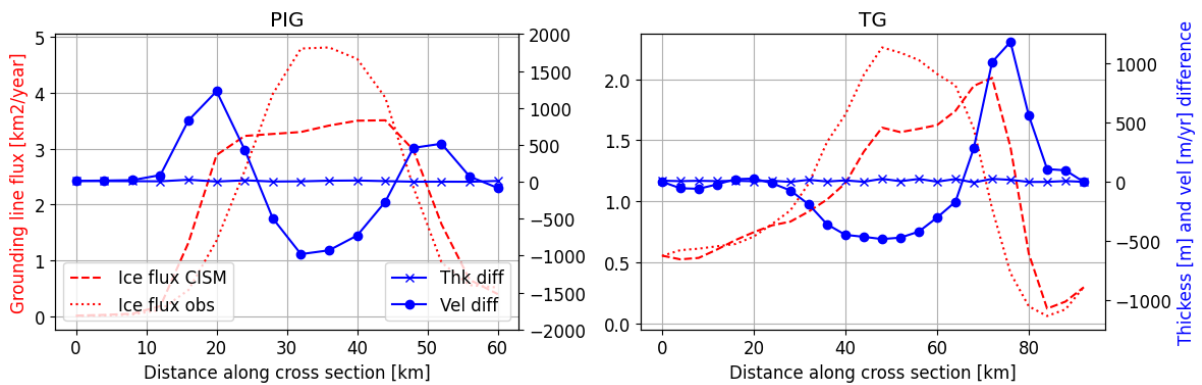

**Figure S5.** Grounding line fluxes (red, dashed: CISM; dotted: observations), thickness differences (blue crosses) and ice surface velocity differences wrt observations (blue dots) of PIG (left) and TG (right) for the default initialization P05. The integrated grounding line fluxes represented as ice velocity times the ice thickness (modelled/observed) are respectively for PIG 30.4/31.1 km<sup>2</sup> yr<sup>-1</sup>, and for TG 24.5/26.1 km<sup>2</sup>/yr.

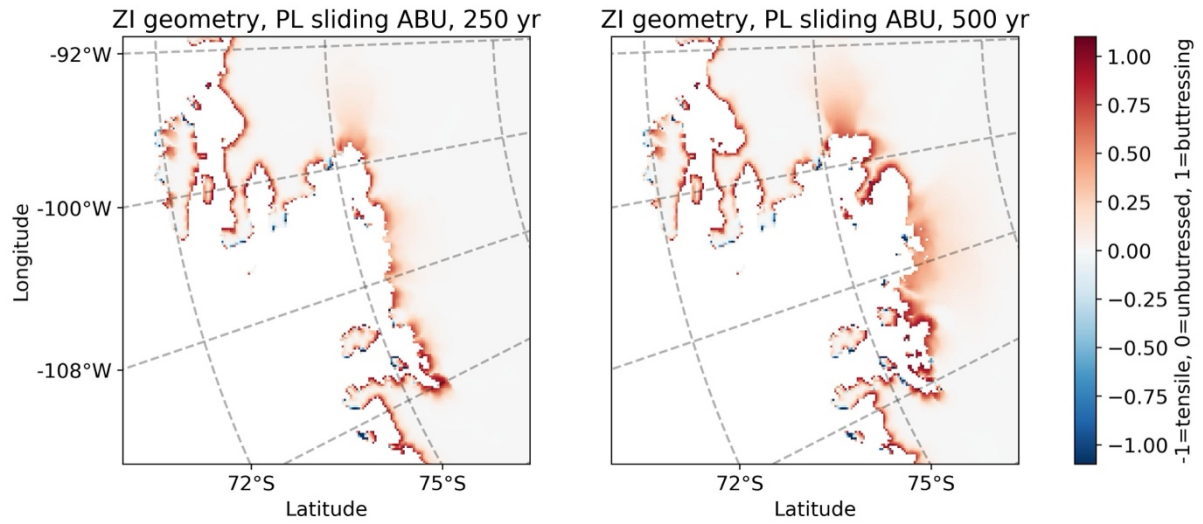

**Figure S6** Acceleration number of the ABUMIP experiments with a sudden switch from ZL to PL after 250 (left) and 500 (right) years.

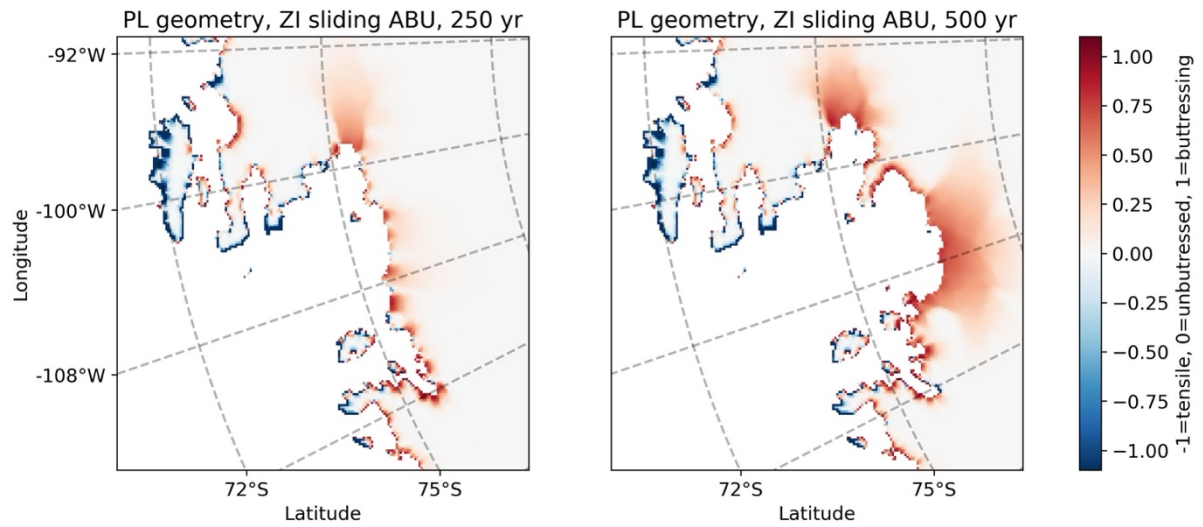

**Figure S7** Acceleration number of the ABUMIP experiments with a sudden switch from ZL to PL after 250 (left) and 500 (right) years.

**Table S1.** Variables used in this study.

| Variables      | Definition                                           |
|----------------|------------------------------------------------------|
| $b$            | Bedrock height [m asl]                               |
| $b_{m\dot{t}}$ | Basal melt rate under floating ice [m/yr]            |
| $C_c$          | Coulomb C [unitless]                                 |
| $C_p$          | Power law C [ $\text{Pa m}^{1/m} \text{yr}^{-1/m}$ ] |

|             |                                                       |
|-------------|-------------------------------------------------------|
| $C_r$       | Basal friction relaxation target [unitless]           |
| $E$         | Flow enhancement factor [unitless]                    |
| $E_r$       | Flow enhancement factor relaxation target [unitless]  |
| $H$         | Modelled ice thickness [m]                            |
| $H_f$       | Ice thickness above floatation [m]                    |
| $H_{obs}$   | Observed ice thickness [m]                            |
| $N$         | Effective pressure [Pa]                               |
| $R$         | Resistive stress tensor [Pa]                          |
| $R_n$       | Normal resistive stress tensor at grounding line [Pa] |
| $R_0$       | Resistive stress tensor without ice [Pa]              |
| $TF_{base}$ | Thermal forcing applied at the ice shelf draft [K]    |
| $u$         | Ice velocity in the x-direction [m/yr]                |
| $v$         | Ice velocity in the y-direction [m/yr]                |
| $u_b$       | Basal velocity magnitude [m/yr]                       |
| $u_{x,b}$   | Basal velocity in the x-direction [m/yr]              |
| $u_{y,b}$   | Basal velocity in the y-direction [m/yr]              |
| $u_s$       | Surface ice velocity magnitude [m/yr]                 |
| $u_{s,obs}$ | Observed surface ice velocity magnitude [m/yr]        |
| $\delta T$  | Ocean temperature correction [K]                      |
| $s$         | Surface elevation [m]                                 |
| $\beta$     | Basal traction parameter [Pa yr m <sup>-1</sup> ]     |
| $\phi$      | Till friction angle [degrees]                         |
| $\eta$      | Effective viscosity [Pa yr]                           |
| $\theta$    | Buttressing fraction [unitless]                       |
| $\tau_b$    | Basal shear stress [Pa]                               |
| $\tau_{ij}$ | Deviatoric stress tensor [Pa]                         |
| $\chi$      | Buttressing number [unitless]                         |
| $\chi_f$    | Stress boundary condition at the calving front [Pa]   |

Table S2. Parameters and their units and values used in this study

| Parameters | Values                 | Units                              | Definition                                           |
|------------|------------------------|------------------------------------|------------------------------------------------------|
| $c_{pw}$   | 3974                   | J kg <sup>-1</sup> K <sup>-1</sup> | Specific heat of seawater                            |
| $g$        | 9.81                   | m s <sup>-2</sup>                  | Gravitational acceleration                           |
| $H_0$      | 100                    | m                                  | Ice thickness scale in the inversion                 |
| $L_f$      | 3.34 x 10 <sup>5</sup> | J kg <sup>-1</sup>                 | Latent heat of fusion                                |
| $m$        | 3                      | -                                  | Basal friction exponent                              |
| $pp$       | 5                      | -                                  | Basal friction exponent, pseudoplastic law           |
| $T_r$      | 0                      | K                                  | Relaxation target of the ocean temperature inversion |

|            |                                                |                                    |                                                                              |
|------------|------------------------------------------------|------------------------------------|------------------------------------------------------------------------------|
| $u_0$      | 200                                            | $\text{m yr}^{-1}$                 | Constant ice speed in the Zoet-Iverson and pseudoplastic laws                |
| $p$        | 0.5                                            | -                                  | Exponent in effective pressure relation                                      |
| $r$        | 0.5                                            | -                                  | Strength of inversion relaxation                                             |
| $\rho_i$   | 917                                            | $\text{kg m}^{-3}$                 | Density of ice                                                               |
| $\rho_w$   | 1027                                           | $\text{kg m}^{-3}$                 | Density of ocean water                                                       |
| $\kappa$   | 100                                            | yr                                 | Time scale in the inversion                                                  |
| $\gamma_0$ | 30000                                          | $\text{m yr}^{-1}$                 | Basal melt rate coefficient                                                  |
| $A_0$      | $1.733 \times 10^3$<br>$3.613 \times 10^{-13}$ | $\text{Pa}^{-3} \text{ s}^{-1}$    | Constant of proportionality for the rate factor (above 263 K), (below 263 K) |
| $Q$        | $139 \times 10^3$ ,<br>$60 \times 10^3$        | $\text{J mol}^{-1}$                | Activation energy for ice creep (above 263 K), (below 263 K)                 |
| $R$        | 8.314                                          | $\text{J mol}^{-1} \text{ K}^{-1}$ | Universal gas constant                                                       |
| $\Phi$     | $9.8 \times 10^{-8}$                           | $\text{K Pa}^{-1}$                 | Pressure-dependent melt constant                                             |
